# Supplementary material for: Mutagenesis of kiwifruit CENTRORADIALIS‐like genes transforms a climbing woody perennial with long juvenility and axillary flowering into a compact plant with rapid terminal flowering
Source: PubMed Central journal article supplement (PMC6587708; doi:10.1111/pbi.13021), 2018-10-25
Supplement: PBI-17-869-s001.pdf [file PBI-17-869-s001.pdf]

Figure S1

|                   | E1                                                  | E4 |
|-------------------|-----------------------------------------------------|----|
| (a) <i>AccEN4</i> | CCTAGGGTTGAAGTTCATGGAGG.....CCACAGGTTTGTGTTTGTGCTCT |    |
| <i>AcCEN</i>      | CCAAGGGTTGAAGTTCATGGAGG.....CCACAGGTTTGTGTTTGTGCTCT |    |
| <i>AccEN1</i>     | CCTAGGGTTGAAATCCAAGGAGG.....CCACAGGTTTGTGTTTGTCTCT  |    |
| <i>AcCEN2</i>     | CCTAGAGTTGAAGTCCATGGAGG.....CCACAGGTTTGTGTTTGTCTGT  |    |
| <i>AcCEN3</i>     | CCTAGAGTTGAAGTCCATGGAGG.....CCACAGGTTTGTGTTTGTCTGT  |    |
| <i>AcBFT1</i>     | GCTCGCGTAGAGATCGGTGGAGA.....CCACCGGTACGTGTTTCATCTGT |    |
| <i>AcBFT2</i>     | CCTCGCGTAGAGATCGGCGGTGA.....CCACCGATACGTGTTCTTCTGT  |    |
| <i>AcBFT3</i>     | CCTCGCGTAGAGATCGGTGGTGA.....CCACCGGTACGTGTTCTCTTGT  |    |
| <i>AcFT</i>       | CCGAGGGTTGATATTGGTGGCGA.....CCATCGCTTTGTCTGGTGCTAT  |    |
| <i>AcFT1</i>      | CCTAGAGTTGATGTTGGAGGTGA.....TCATCGCTTTGTGTTCTGTTGT  |    |
| <i>AcFT2</i>      | CCTAGGGTTGATATTGGAGGTGA.....TCATCGCTTTGTGTTCTGTTGT  |    |
| <i>AcMFT1</i>     | CCTAGGGTCACCATCTCTGGTCA.....CCACAGGTATACTAGGTCTCT   |    |
| <i>AcMFT2</i>     | CCTAGGGTCACAATCACTGGCCA.....ACATCGCTGCATCCTGCTTCTGT |    |

(b) U6-CEN4 construct (1150 nt):

attB1-GCT-pU6-26 (387 bp)-

GATTGAGAGCACAAACACAAACCTGGTTTTAGAGCTAGAAATAGCAAGTTAAAATAAGGCTAGTCCGTTATCA

ACTTGAAAAAGTGGCACCGAGTCGGTGCTTTTTTCAAGAGCTTGGAGTGGATGGAATCGGCAGCAAAGGA-

pU6-29 (319 bp)-

GATTGCCTAGGGTTGAAGTTCATGGTTTTAGAGCTAGAAATAGCAAGTTAAAATAAGGCTAGTCCGTTATCA

ACTTGAAAAAGTGGCACCGAGTCGGTGCTTTTTTACCc-attL2

U3-CEN4 construct (868 nt):

attB1-GCT-pU3-b(324 bp)-

GGTCAGAGCACAAACACAAACCTGGTTTTAGAGCTAGAAATAGCAAGTTAAAATAAGGCTAGTCCGTTATCAA

CTTGAAAAAGTGGCACCGAGTCGGTGCTTTTTTCAAGAGCTTGGAGTGGATGGAATCGGCAGCAAAGGA-

pU3-d (101 bp)-

GGTCACCTAGGGTTGAAGTTCATGGTTTTAGAGCTAGAAATAGCAAGTTAAAATAAGGCTAGTCCGTTATCA

ACTTGAAAAAGTGGCACCGAGTCGGTGCTTTTTTACC-attL2

**Supplementary Figure S1.** Selection of CRISPR/Cas9 target sequences and construct design. (a) Alignment of the corresponding target E1 and E4 regions in *AccEN4*, *AcCEN* and other *A. chinensis* *CEN*, *BROTHER OF FT (BFT)*, *MOTHER OF FT (MFT)* and *FT* genes. PAM sequence is in red and mismatches are highlighted in yellow. (b) The sequence of constructs used for CRISPR/Cas9-mediated editing of *AccEN4* and *AcCEN* genes. Green, gene-specific target sequence (protospacer); red, guide RNA (crRNA, linker loop and tracrRNA); blue, end of the promoter sequence; underlined, +1 position (appropriate nucleotide added where necessary, G and A for pU6 and pU3, respectively).

Figure S2

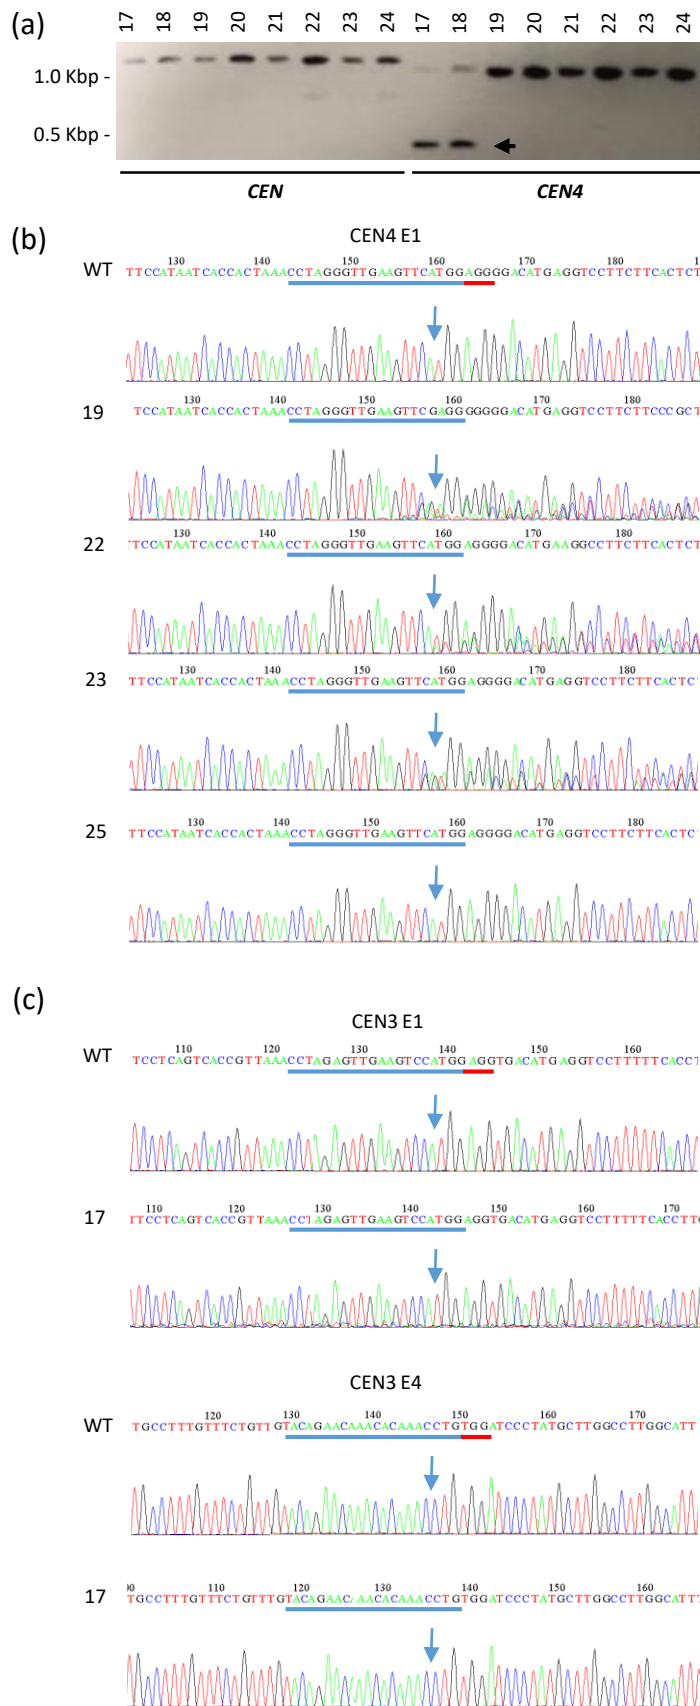

**Supplementary Figure S2.** Evaluation of CRISPR/Cas9-mediated gene editing in transgenic kiwifruit. (a) Example of amplification using gene-specific primers, which identified the E1-E4 deletion in *AccEN4* in lines 17 and 18 (arrow). (b) Examples of wild-type (top) and edited *AccEN4* E1 regions identified by sequencing of the PCR fragment. (c) Wild-type *AccEN3* E1 and E4 regions identified by sequencing of the PCR fragment in early flowering line 17.

Figure S3

(a)

|                 | <i>AccEN4</i> | E1                            | E4                         |  | <i>AccEN</i> | E1                            | E4                                  |
|-----------------|---------------|-------------------------------|----------------------------|--|--------------|-------------------------------|-------------------------------------|
|                 | WT            | ...CCTAGGGTTGAAGTTCATGG.....  | ...CAGGTTTGTGTTTGTGCTCT... |  | WT           | ...CCAAGGGTTGAAGTTCATGG.....  | ...CAGGTTTGTGTTTGTGCTCT...          |
| U6-CEN4#14 *    | 14.DEL        | ...CCTAGGGTTGAAGTTCA-----     | -----GTTTGTGTTTGTGCTCT...  |  | CEN.1        | ...CCAAGGGTTGAAGTTCATGG.....  | ...CAG (156nt) GTTTGTGTTTGTGCTCT... |
|                 | CEN4.1        | ...CCTAGGGTTGAAGTTCAATGG..... | ...CAG-----TGTTTGTGCTCT... |  | CEN.2        | ...CCAAGGGTTGAAGTTCATGG.....  | ...CAG (156nt) GTTTGTGTTTGTGCTCT... |
|                 | CEN4.2        | ...CCTAGGGTTGAAGTTCAATGG..... | ...CAG-----TGTTTGTGCTCT... |  | CEN.3        | ...CCAAGGGTTGAAGTTCATGG.....  | ...CAG (156nt) GTTTGTGTTTGTGCTCT... |
|                 | CEN4.3        | ...CCTAGGGTTGAAGTTCAATGG..... | ...CAG-TTT-----            |  | CEN.4        | ...CCAAGGGTTGAAGTTCATGG.....  | ...CAG (156nt) GTTTGTGTTTGTGCTCT... |
|                 | CEN4.4        | ...CCTAGGGTTGAAG--ATGG.....   | ...CAG-TTT-----            |  |              |                               |                                     |
| U6-CEN4#18 **   | 18.DEL        | ...CCTAGGGTTGAAGTTCA-----     | -----GTTTGTGTTTGTGCTCT...  |  | CEN.1        | ...CCAAGGGTTGAAGTT-ATGG.....  | ...CAGAGTTTGTGTTTGTGCTCT...         |
|                 | CEN4.1        | ...CCTAGGGTTGAAG--ATGG.....   | ...CAG-TTT-----            |  | CEN.2        | ...CCAAGGGTTGAAGTTCATGG.....  | ...CAG-----GTGTTTGTGCTCT...         |
|                 | CEN4.2        | ...CCTAGGGTTGAAGTTCAATGG..... | ...CAG-----TGTTTGTGCTCT... |  | CEN.3        | ...CCAAGGGTTGAAGTTCATGG.....  | ...CAG-----GTGTTTGTGCTCT...         |
|                 | CEN4.3        | ...CCTAGGGTTGAAG--ATGG.....   | ...CAG-TTT-----            |  | CEN.4        | ...CCAAGGGTTGAAGTT-ATGG.....  | ...CAGAGTTTGTGTTTGTGCTCT...         |
|                 | CEN4.4        | ...CCTAGGGTTGAAG--ATGG.....   | ...CAG-TTT-----            |  |              |                               |                                     |
| U6-CEN4#17 **   | 17.DEL        | ...CCTAGGGTTGAAGTTCA-----     | -----GTTTGTGTTTGTGCTCT...  |  | CEN.1        | ...CCAAGGGTTGAAGTT-ATGG.....  | ...CAGGTTTGTGTTTGTGCTCT...          |
|                 | CEN4.1        | ...CCTAGGGTTGAAGTTCAATGG..... | ...CAGGTTTGTGTTTGTGCTCT... |  | CEN.2        | ...CCAAGGGTTGAAGTT-ATGG.....  | ...CAGGTTTGTGTTTGTGCTCT...          |
|                 | CEN4.2        | ...CCTAGGGTTGAAGTTCAATGG..... | ...CAGGTTTGTGTTTGTGCTCT... |  | CEN.3        | ...CCAAGGGTTGAAGTTCATGG.....  | ...CAGGTTTGTGTTTGTGCTCT...          |
|                 | CEN4.3        | ...CCTAGGGTTGAAGTTCAATGG..... | ...CAGGTTTGTGTTTGTGCTCT... |  | CEN.4        | ...CCAAGGGTTGAAGTTCATGG.....  | ...CAGGTTTGTGTTTGTGCTCT...          |
|                 | CEN4.4        | ...CCTAGGGTTGAAGTTCAATGG..... | ...CAGGTTTGTGTTTGTGCTCT... |  |              |                               |                                     |
| U6-CEN4#7 ***   | CEN4.1        | ...CCTAGGGTTGAAGTTCAATGG..... | ...CAGGTTTGTGTTTGTGCTCT... |  | CEN.1        | ...CCAAGGGTTGAAGTTCATGG.....  | ...CAGAGTTTGTGTTTGTGCTCT...         |
|                 | CEN4.2        | ...CCTAGGGTTGAAGTTCAATGG..... | ...CAGGTTTGTGTTTGTGCTCT... |  | CEN.2        | ...CCAAGGGTTGAAGTTCATGG.....  | ...CAGAGTTTGTGTTTGTGCTCT...         |
|                 | CEN4.3        | ...CCTAGGGTTGAAGTTCAATGG..... | ...CAGGTTTGTGTTTGTGCTCT... |  | CEN.3        | ...CCAAGGGTTGAAGTTCATGG.....  | ...CAGGTTTGTGTTTGTGCTCT...          |
|                 | CEN4.4        | ...CCTAGGGTTGAAGTTCAATGG..... | ...CAGGTTTGTGTTTGTGCTCT... |  | CEN.4        | ...CCAAGGGTTGAAGTTCATGG.....  | ...CAGGTTTGTGTTTGTGCTCT...          |
|                 |               |                               |                            |  |              |                               |                                     |
| U6-CEN4#22 **** | CEN4.1        | ...CCTAGGGTTGAAGTTCAATGG..... | ...CAGGTTTGTGTTTGTGCTCT... |  | CEN.1        | ...CCAAGGGTTGAAGTTCATGG.....  | ...CAGGTTTGTGTTTGTGCTCT...          |
|                 | CEN4.2        | ...CCTAGGGTTGAAGTTCAATGG..... | ...CAGGTTTGTGTTTGTGCTCT... |  | CEN.2        | ...CCAAGGGTTGAAGTTCATGG.....  | ...CAGGTTTGTGTTTGTGCTCT...          |
|                 | CEN4.3        | ...CCTAGGGTTGAAGTTCATGG.....  | ...CAGGTTTGTGTTTGTGCTCT... |  | CEN.3        | ...CCAAGGGTTGAAGTTCATGG.....  | ...CAGGTTTGTGTTTGTGCTCT...          |
|                 | CEN4.4        | ...CCTAGGGTTGAAGTTCATGG.....  | ...CAGGTTTGTGTTTGTGCTCT... |  | CEN.4        | ...CCAAGGGTTGAAGTTCATGG.....  | ...CAGGTTTGTGTTTGTGCTCT...          |
|                 |               |                               |                            |  |              |                               |                                     |
| U6-CEN4#19 **** | CEN4.1        | ...CCTAGGGTTGAAGTTCAATGG..... | ...CAGGTTTGTGTTTGTGCTCT... |  | CEN.1        | ...CCAAGGGTTGAAGTTCATGG.....  | ...CAG--TGTTTGTGCTCT...             |
|                 | CEN4.2        | ...CCTAGGGTTGAAGTT--GG.....   | ...CAGGTTTGTGTTTGTGCTCT... |  | CEN.2        | ...CCAAGGGTTGAAGTTCAATGG..... | ...CAGGTTTGTGTTTGTGCTCT...          |
|                 | CEN4.3        | ...CCTAGGGTTGAAGTTCATGG.....  | ...CAGGTTTGTGTTTGTGCTCT... |  | CEN.3        | ...CCAAGGGTTGAAG--GG.....     | ...CAG--TGTTTGTGCTCT...             |
|                 | CEN4.4        | ...CCTAGGGTTGAAGTTCATGG.....  | ...CAGGTTTGTGTTTGTGCTCT... |  | CEN.4        | ...CCAAGGGTTGAAGTTCATGG.....  | ...CAGGTTTGTGTTTGTGCTCT...          |
|                 |               |                               |                            |  |              |                               |                                     |

(b)

|              |                               | g1                            | g2                            | g3                           | g4                        |
|--------------|-------------------------------|-------------------------------|-------------------------------|------------------------------|---------------------------|
|              | WT <i>AcCEN4</i>              | ...CTAGTAGTTGGAAGAGTGAT.....  | ...CATAATCACCACCTAAACCTA..... | ...CCTTTGGTATGTATTAATTA..... | ...CTTCAGTACCCGGAAATTG... |
| PTG-CEN4 *** | CEN4.1                        | ...CTAGTAGTTGGAAGAGTGAT.....  | ...CATAATCACCACCTAAACCTA..... | ...CCT-----ATTA.....         | ...CTTCAGTACCCGGAAATTG... |
|              | CEN4.2                        | ...CTAGTAGTTGGAAGAGTGAT.....  | ...CATAATCACCACCTAAA-CTA..... | ...CCT-----ATTA.....         | ...CTTCAGTACCCGGAA-TTG... |
|              | CEN4.3                        | ...CTAGTAGTTGGAAGAGTGAT.....  | ...CATAATCACCACCTAAA-CTA..... | ...CCT-----ATTA.....         | ...CTTCAGTACCCGGAA-TTG... |
|              | CEN4.4                        | ...CTAGTAGTTGGAAGAGTGAT.....  | ...CATAATCACCACCTAAA-CTA..... | ...CCT-----ATTA.....         | ...CTTCAGTACCCGGAA-TTG... |
|              |                               |                               |                               |                              |                           |
|              | WT <i>AcCEN</i>               | ...TCCATAGTCACCACCTAAACC..... | ...TCCTAGTGATCCATATCTGA.....  | ...TCCTGTGCTGCTGTGTCTCT..... | ...TGTGTTCTTCAATGCCAAA... |
| CEN.1        | ...TCCATAGTCACCACCTAAACC..... | ...TCCTAGTGATCCATATCTGA.....  | ...TCCTGTGCTGCTGTGTCTCT.....  | ...TGTGTTCTTCAATGCCAAA...    |                           |
| CEN.2        | ...TCCATAGTCACCACCTAAACC..... | ...TCCTAGTGATCCATATCTGA.....  | ...TCCTGTGCTGCTGTGTCTCT.....  | ...TGTGTTCTTCAATGCCAAA...    |                           |
| CEN.3        | ...TCCATAGTCACCACCTAAACC..... | ...TCCTAGTGATCCATATCTGA.....  | ...TCCTGTGCTGCTGTGTCTCT.....  | ...TGTGTTCTTCAATGCCAAA...    |                           |
| CEN.4        | ...TCCATAGTCACCACCTAAACC..... | ...TCCTAGTGATCCATATCTGA.....  | ...TCCTGTGCTGCTGTGTCTCT.....  | ...TGTGTTCTTCAATGCCAAA...    |                           |

(c)

|             |                               | g1                            | g2                               | g3                           | g4                        |
|-------------|-------------------------------|-------------------------------|----------------------------------|------------------------------|---------------------------|
|             | WT <i>AcCEN4</i>              | ...CTAGTAGTTGGAAGAGTGAT.....  | ...CATAATCACCACCTAAACCTA.....    | ...CCTTTGGTATGTATTAATTA..... | ...CTTCAGTACCCGGAAATTG... |
| PTG-CEN *** | CEN4.1                        | ...CTAGTAGTTGGAAGAGTGAT.....  | ...CATAATCACCACCTAAACCTA.....    | ...CCTTTGGTATGTATTAATTA..... | ...CTTCAGTACCCGGAAATTG... |
|             | CEN4.2                        | ...CTAGTAGTTGGAAGAGTGAT.....  | ...CATAATCACCACCTAAACCTA.....    | ...CCTTTGGTATGTATTAATTA..... | ...CTTCAGTACCCGGAAATTG... |
|             | CEN4.3                        | ...CTAGTAGTTGGAAGAGTGAT.....  | ...CATAATCACCACCTAAACCTA.....    | ...CCTTTGGTATGTATTAATTA..... | ...CTTCAGTACCCGGAAATTG... |
|             | CEN4.4                        | ...CTAGTAGTTGGAAGAGTGAT.....  | ...CATAATCACCACCTAAACCTA.....    | ...CCTTTGGTATGTATTAATTA..... | ...CTTCAGTACCCGGAAATTG... |
|             |                               |                               |                                  |                              |                           |
|             | WT <i>AcCEN</i>               | ...TCCATAGTCACCACCTAAACC..... | ...TCCTAGTGATCCATATCTGA.....     | ...TCCTGTGCTGCTGTGTCTCT..... | ...TGTGTTCTTCAATGCCAAA... |
| CEN.1       | ...TCCATAGTCACCACCTAAACC..... | ...TCCTAGTGATC-----TGA.....   | ...TCC--TTGCTGCTGTGTCTCT.....    | ...TGTGTTCTTCAATGC--AAA...   |                           |
| CEN.2       | ...TCCA--GTCACCACCTAAACC..... | ...TCCTAGTGATCCATA--TGA.....  | ...TCC--TTGCTGCTGCTGTGTCTCT..... | ...TGTGTTCTTCAATGCC--AA...   |                           |
| CEN.3       | ...TCCATAGTCACCACCTAAACC..... | ...TCCTAGTGATC-----TGA.....   | ...TCC--TTGCTGCTGTGTCTCT.....    | ...TGTGTTCTTCAATGC--AAA...   |                           |
| CEN.4       | ...TCCATAGTCACCACCTAAACC..... | ...TCCTAGTGATC-----TGA.....   | ...TCC--TTGCTGCTGTGTCTCT.....    | ...TGTGTTCTTCAATGC--AAA...   |                           |
| CEN.5       | ...TCCATAGTCACCACCTAAACC..... | ...TCCTAGTGATC-----TGA.....   | ...TCC--TTGCTGCTGTGTCTCT.....    | ...TGTGTTCTTCAATGC--AAA...   |                           |

Supplementary Figure S3. Mutations (red font) identified in *AccEN4* and *AccEN* alleles in U6-CEN4 (a), PTG-CEN4 (b) and PTG-CEN (c) lines. At least four clones of gene-specific amplification products were subjected to sequence analysis. wt, wild-type; +, insertion; -, deletion.
